# Supplementary figures and images for: Long-term Safety and Efficacy of the Anti-MAdCAM-1 Monoclonal Antibody Ontamalimab [SHP647] for the Treatment of Ulcerative Colitis: The Open-label Study TURANDOT II
Source: PubMed Central journal article supplement — J Crohns Colitis. 2021 Feb 18;15(6):938–49. doi: 10.1093/ecco-jcc/jjab023 (PMC8218706; doi:10.1093/ecco-jcc/jjab023), 2021-02-18

A

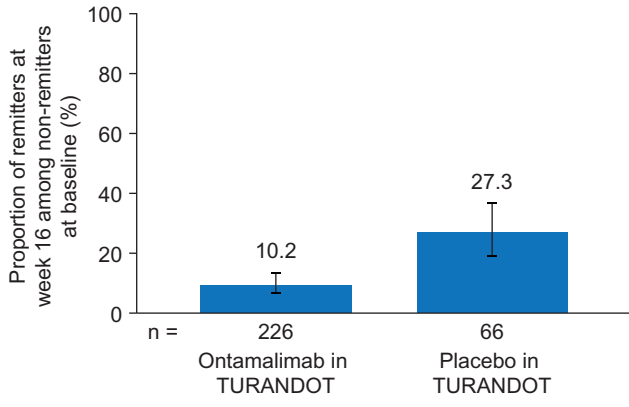

B

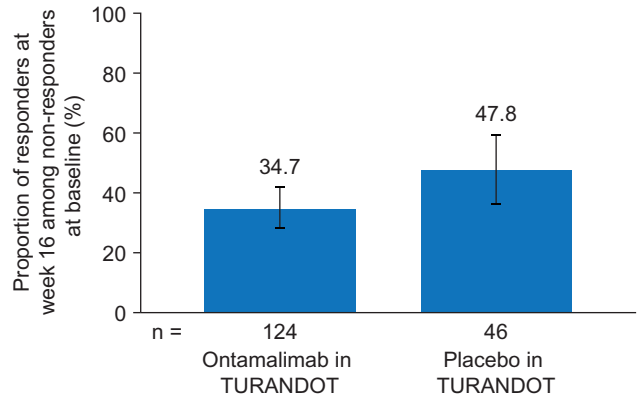

Supplement: jjab023_suppl_supplementary_figure_s1.pdf [file jjab023_suppl_supplementary_figure_s1.pdf]

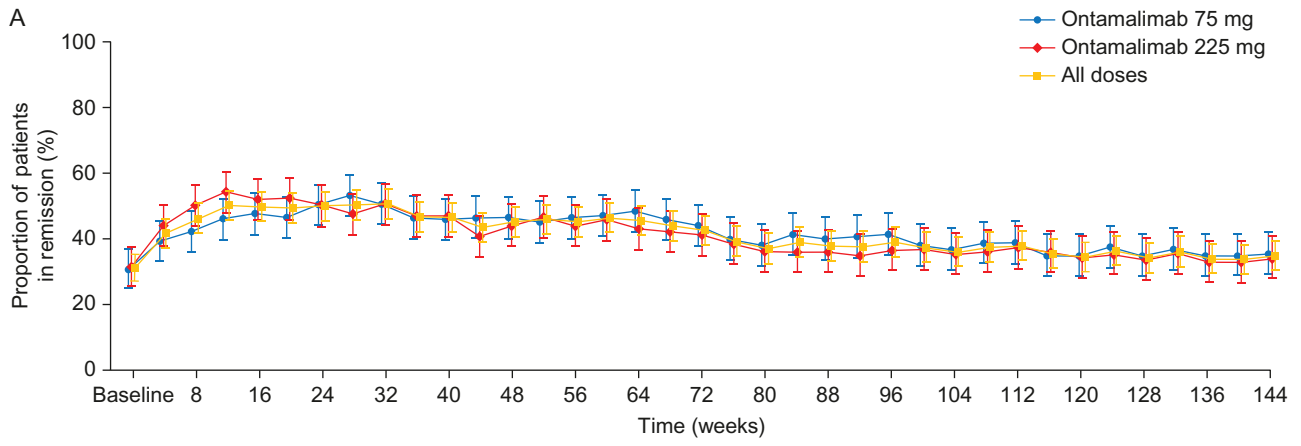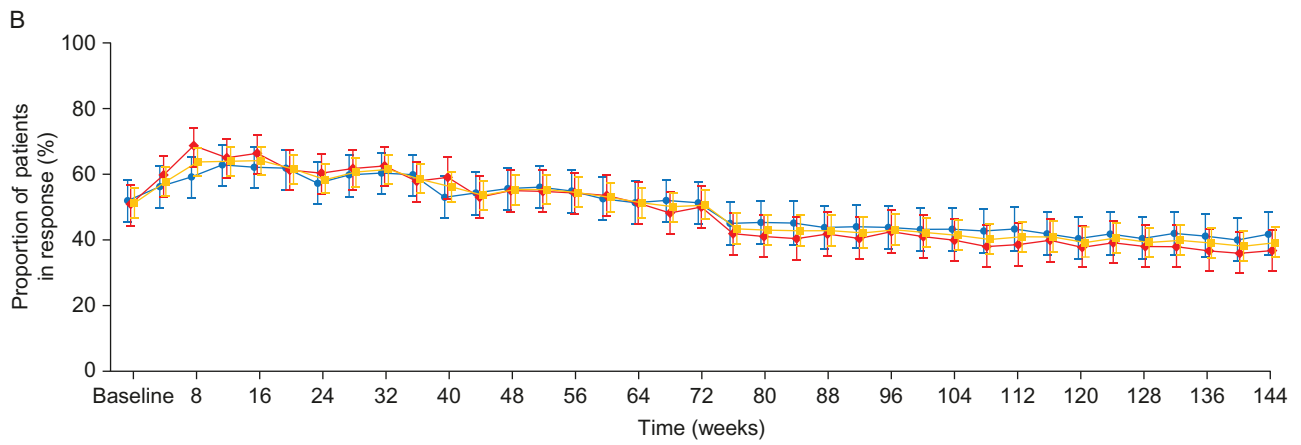

Supplement: jjab023_suppl_supplementary_figure_s2.pdf [file jjab023_suppl_supplementary_figure_s2.pdf]
